# Supplementary material for: Acceptance of a COVID-19 Vaccine in Japan during the COVID-19 Pandemic
Source: Vaccines (Basel). 2021 Mar 3;9(3):210. doi: 10.3390/vaccines9030210 (PMC8002097; doi:10.3390/vaccines9030210)
Supplement: Supplementary file 1 [file vaccines-09-00210-s001.pdf]

**Supplementary Material: Actual questions and response options translated from Japanese to English**

| <b>Variable</b>                                                                                           | <b>Questions</b>                                                                                                        | <b>Response options</b>                                                          |
|-----------------------------------------------------------------------------------------------------------|-------------------------------------------------------------------------------------------------------------------------|----------------------------------------------------------------------------------|
| Assessment of participants' likelihood of getting a COVID-19 vaccine [18]                                 | How likely are you to get vaccinated for coronavirus once a vaccine is available to the public?                         | 1.very unlikely 2. somewhat unlikely 3. somewhat likely 4. very likely 5. unsure |
| Perceived likelihood of becoming infected with COVID-19 in the future [26,27]                             | What do you consider to be your own probability of getting infected with COVID-19?                                      | Extremely unlikely [1] [2] [3] [4] [5] [6] [7] Extremely likely                  |
| Perceived severity of a COVID-19 infection [26,27]                                                        | How severe would contracting COVID-19 be for you (how seriously ill do you think you will be)?                          | Not severe [1] [2] [3] [4] [5] [6] [7] Very severe                               |
| Perceived effectiveness of a COVID-19 vaccine [26,27]                                                     | I believe a vaccine can help control the spread of COVID-19                                                             | Strongly disagree [1] [2] [3] [4] [5] [6] [7] Strongly agree                     |
| Willingness to protect other by getting oneself vaccinated [26,27]                                        | When everyone else is vaccinated against COVID-19, then I don't have to get vaccinated                                  | Strongly agree [1] [2] [3] [4] [5] [6] [7] Strongly disagree                     |
| Significance of identified factors influencing respondents' decision-making regarding vaccination [26,27] | If a COVID-19 vaccine is made available in my country, my decision of whether or not to get vaccinated would depend on: | -                                                                                |
| Safety of vaccines [26,27]                                                                                | Whether the vaccine has been in use for a long time with no serious side-effects                                        | Not at all [1] [2] [3] [4] [5] [6] [7] Very much so                              |
| Vaccine accessibility [26,27]                                                                             | How easy it is to get the vaccine                                                                                       | Not at all [1] [2] [3] [4] [5] [6] [7] Very much so                              |
| Doctor's recommendation [26,27]                                                                           | Recommendation from my family doctor                                                                                    | Not at all [1] [2] [3] [4] [5] [6] [7] Very much so                              |

**References:**

18. Szilagyi, P.G.; Thomas, K.; Shah, M.D.; Vizueta, N.; Cui, Y.; Vangala, S.; Kapteyn, A. National Trends in the US Public's Likelihood of Getting a COVID-19 Vaccine-April 1 to December 8, 2020. *JAMA* 2020, 10.1001/jama.2020.26419, doi:10.1001/jama.2020.26419.
26. Betsch, C.; Wieler, L.H.; Habersaat, K.; COSMO group. Monitoring behavioural insights related to COVID-19. *Lancet* 2020, 395, 1255-1256, doi:10.1016/S0140-6736(20)30729-7.
27. World Health Organization regional office for Europe. COVID-19 Snapshot Monitoring (COSMO). Available online: <https://www.psycharchives.org/handle/20.500.12034/2397> (accessed on 28 January 2021).
